# Supplementary material for: Ionic conductivity, mechanical strength and Li-ion battery performance of mono-functional and bi-functional (“Janus”) “soggy sand” electrolytes
Source: Royal Society of Chemistry journal article supplement (doi:10.1039/c0ee00566e), 2011-01-01
Supplement: c0ee00566e.pdf [file c0ee00566e.pdf]

**Supporting Information****Ionic Conductivity, Mechanical Strength and Li-ion Battery Performance of Mono-functional and Bi-functional (“Janus”) “Soggy Sand” Electrolytes**Shymal K. Das,<sup>a</sup> Soumit S. Mandal and Aninda Jiban Bhattacharyya<sup>\*a</sup>

[\*] Dr. Aninda J. Bhattacharyya Corresponding-Author,

<sup>a</sup> Solid State and Structural Chemistry Unit, Indian Institute of Science, Bangalore 560012, India

E-mail: aninda\_jb@sscu.iisc.ernet.in

<sup>a</sup> Mr. Shyamal K. Das and Soumit S. Mandal

Solid State and Structural Chemistry Unit, Indian Institute of Science, Bangalore 560012, India

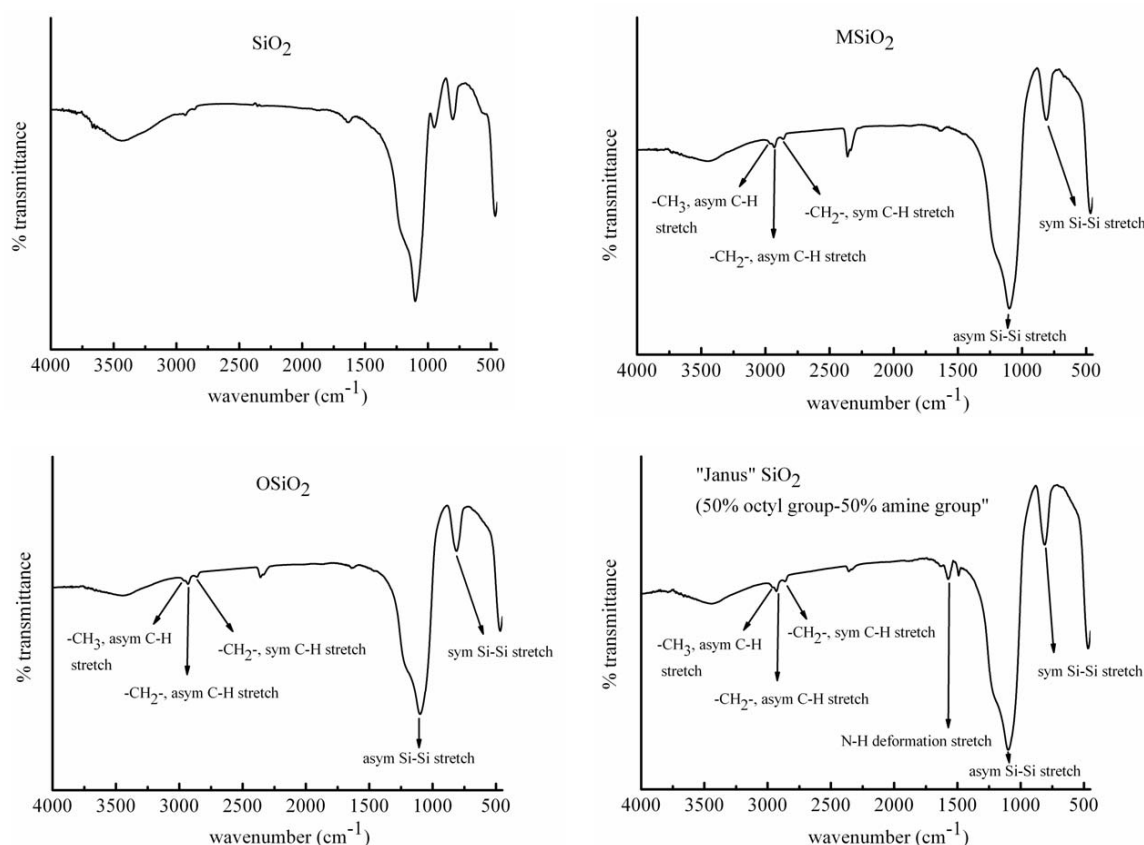

Supporting Figure 1: Fourier transform infrared spectroscopy (FTIR) of various silica particles. (SiO<sub>2</sub>: “Stöber” particles, MSiO<sub>2</sub>: methyl capped SiO<sub>2</sub>, OSiO<sub>2</sub>: octyl capped SiO<sub>2</sub>). In order to check the “Janus” nature of the synthesized particles, functionalization of the opposite hemispheres of SiO<sub>2</sub> by 50% octyl group and 50% amine group is done according to the procedure described in experimental section. The simultaneous presence of various C-H stretching and N-H stretching in the FTIR spectra signifies successful synthesis of “Janus” SiO<sub>2</sub>.

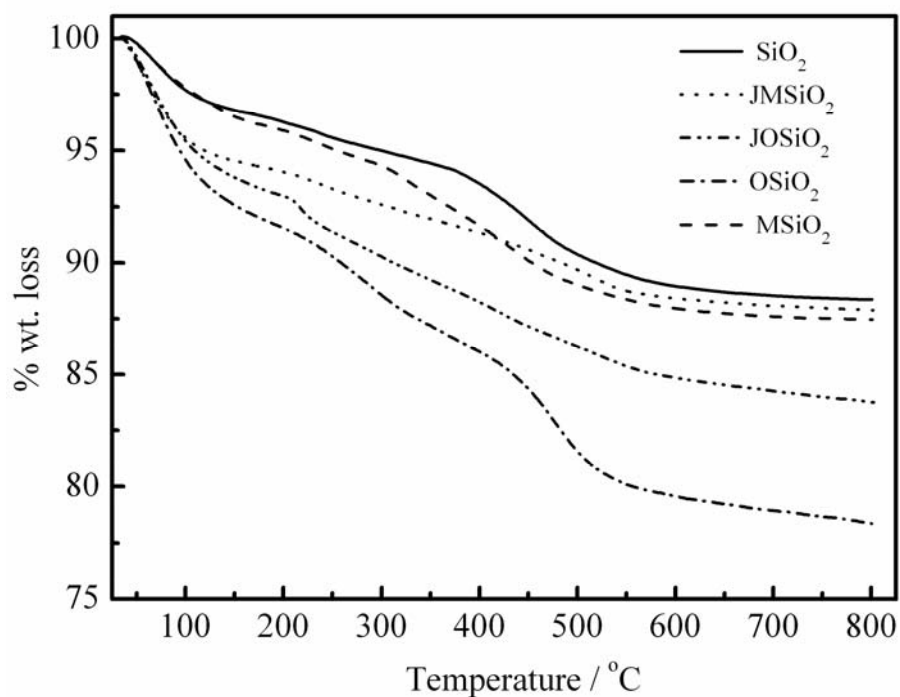

Supporting Figure 2: Thermogravimetry analysis (TGA) of various silica particles in the temperature range (25- 800) °C (under O<sub>2</sub> atmosphere; heating rate= 5 °Cmin<sup>-1</sup>). (SiO<sub>2</sub>: “Stöber” particles, MSiO<sub>2</sub>: methyl capped SiO<sub>2</sub>, OSiO<sub>2</sub>: octyl capped SiO<sub>2</sub>, JMSiO<sub>2</sub>: methyl capped “Janus” particles, JOSiO<sub>2</sub>: octyl capped “Janus” particles).

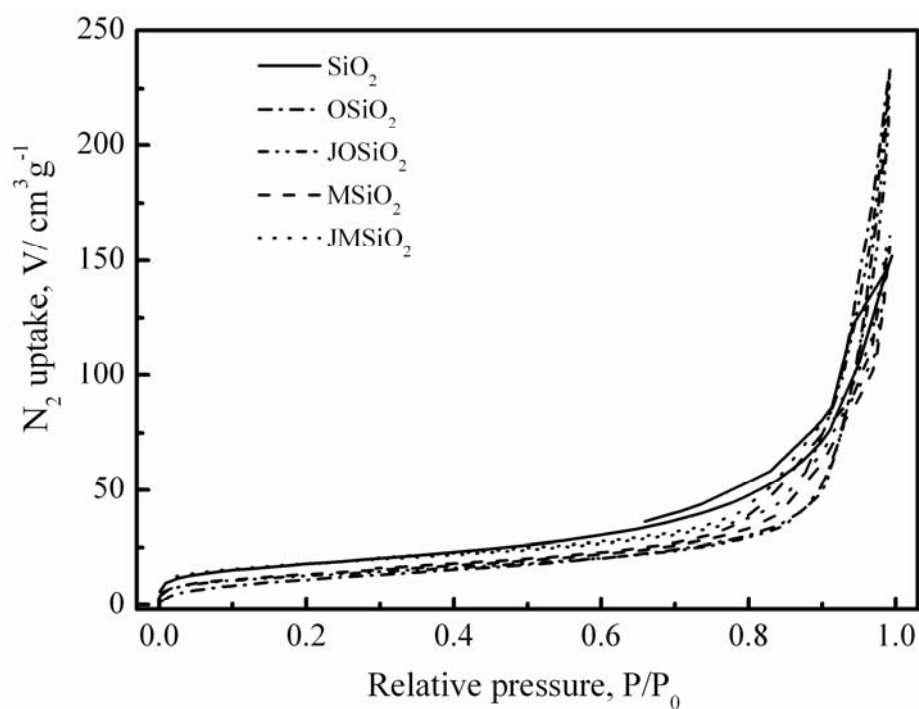

Supporting figure 3: N<sub>2</sub> adsorption/desorption isotherms of various silica particles. (SiO<sub>2</sub>: “Stöber” particles, MSiO<sub>2</sub>: methyl capped SiO<sub>2</sub>, OSiO<sub>2</sub>: octyl capped SiO<sub>2</sub>, JMSiO<sub>2</sub>: methyl capped “Janus” particles, JOSiO<sub>2</sub>: octyl capped “Janus” particles).
